# Supplementary material
Source: MDPI journal article supplement (https://www.mdpi.com/2311-7524/8/6/540)
Supplement: s1 [file s1]

# Supplementary Materials

**Table S1.** The names and accession numbers of other strains used for comparison.

| Strain                                               | Accession number  |
|------------------------------------------------------|-------------------|
| <i>Fusarium oxysporum</i> f. sp. <i>conglutinans</i> | EGU85821.1        |
| <i>Fusarium oxysporum</i> f. sp. <i>raphani</i>      | EXL01186.1        |
| <i>Fusarium oxysporum</i> f. sp. <i>lycopersici</i>  | XP_018235573.1    |
| <i>Fusarium oxysporum</i> f. sp. <i>vasinfectum</i>  | EXM37177.1        |
| <i>Fusarium verticillioides</i>                      | XP_018750404.1    |
| <i>Fusarium albosuccineum</i>                        | KAF4458330.1      |
| <i>Fusarium proliferatum</i>                         | KAG4260530.1      |
| <i>Saccharomyces cerevisiae</i>                      | <u>DAA11457.1</u> |
| <i>Saccharomyces cerevisiae</i>                      | GFP71289.1        |
| <i>Saccharomyces pastorianus</i>                     | QID88455.1        |
| <i>Zygosaccharomyces bailii</i>                      | CDH16539.1        |
| <i>Zygosaccharomyces parabailii</i>                  | AQZ15506.1        |

**Table S2.** All primers used in the study.

| Primers          | Sequence(5'-3')                           | PCR purpose                                                           |
|------------------|-------------------------------------------|-----------------------------------------------------------------------|
| UpF              | CCAGGGACACGTACTAGGGT                      | Amplify the left                                                      |
| UpR              | <u>CTCCAGCCAAG</u> CGGCGATGTAACTTGAAAA    | homologous arm of <i>Nto1</i>                                         |
| DpR              | TGAGAAGCCCTAACTACTAAAC                    | Amplify the right                                                     |
| DpF              | <u>GCCGACCGGG</u> TAATGATCGTGGAATCTGAAC   | homologous arm of <i>Nto1</i>                                         |
| HuF              | <u>TACATCGCCG</u> CTTGGCTGGAGCTAGTGGAGGT  | Amplify the <i>Hyg</i> -cassettes                                     |
| HdF              | CGTTGCAAGACCTGCCTGAA                      |                                                                       |
| HuR              | ATGCCTCCGCTCGAAGTA                        | Amplify the <i>yg</i> -cassettes                                      |
| HdR              | <u>ACGATCATT</u> ACCCGGTCGGCATCTACTCTATTC |                                                                       |
| PeF              | CGACTGGGCCATCAACAGTAT                     | Amplify the fragment of <i>Nto1</i>                                   |
| PeR              | TCACCAACGGCTGCAGACT                       |                                                                       |
| HL               | CTTGGCTGGAGCTAGTGGAGGT                    | Amplify the fragment of <i>Hyg</i>                                    |
| HR               | CCCGGTCGGCATCTACTCTATTC                   |                                                                       |
| CupF             | AAAGTCCTGGGATTCTATTTATGG                  | Confirm whether the <i>Hyg</i> gene homologously replaced <i>Nto1</i> |
| CupR             | GACAGACGTCGCGGTGAGTT                      |                                                                       |
| CdpF             | TCTGGACCGATGGCTGTGTAG                     | Confirm whether the <i>Hyg</i> gene homologously replaced <i>Nto1</i> |
| CdpR             | GGGCTGCCTACACTAAATGG                      |                                                                       |
| PrF              | GCTGAGTGAGAGATTGAAGGGTTG                  | Amplify the 523-bp probe for mutants Southern blot                    |
| PrR              | CCTGGTCTACTGACTGAGTTATGC                  |                                                                       |
| CpF <sup>1</sup> | <u>GACTAGTC</u> ATGCACCACAAGCGTCGGAGT     | Amplification <i>Nto1</i> complete sequence                           |
| CpR <sup>1</sup> | <u>AAGGGCCCT</u> TGTTCCGTCAAAGCATGGT      |                                                                       |
| NF               | TAGGGCGAATTGGGTAC                         | Amplify the fragment of <i>Neo</i>                                    |
| NR               | CAGCTCACTGTTACGTC                         |                                                                       |
| PcF              | AACACCGCCTGAGTCATCTACG                    | Amplify the 485-bp probe for complemented strains Southern blot       |
| PcR              | CCTCCTTCACACCTGCCTCAAC                    |                                                                       |
| IrF              | CATCGGCCACGTCGACTCT                       | Amplify fragment from elongation factor2 gene                         |
| IrR              | AGAACCCAGGCGTACTTGAA                      |                                                                       |

Underlined texts indicate overlapped regions for fusion PCR; <sup>1</sup> Underlined texts indicate introduced digest site.
